# Supplementary material for: Tumour growth environment modulates Chk1 signalling pathways and Chk1 inhibitor sensitivity
Source: PubMed Central journal article supplement (PMC5075878; doi:10.1038/srep35874), 2016-10-24
Supplement: srep35874-s1.pdf [file srep35874-s1.pdf]

# Tumour growth environment modulates Chk1 signalling pathways and sensitivity to Chk1 inhibition

Andrew J Massey

## Supplementary Information

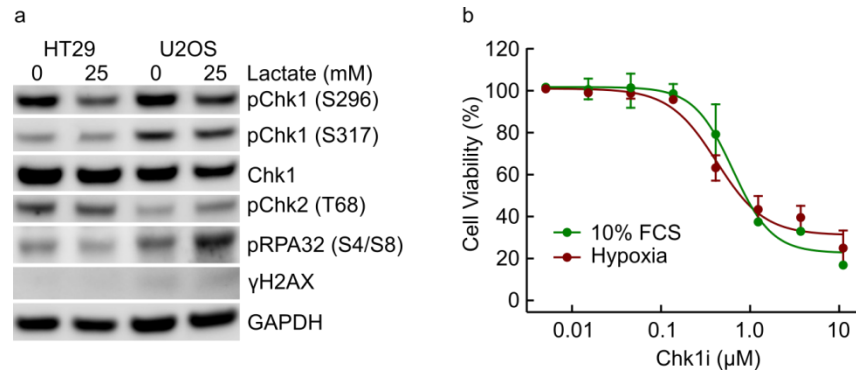

**Supplementary Figure S1.** Related to Fig. 1.

(a) HT29 or U2OS cells in 10% FCS were exposed to 25 mM sodium lactate for 24 hours. Cell lysates were immunoblotted using the indicated antibodies. (b) HT29 cells growing in 10% FCS/normoxia or 10% FCS/hypoxia were treated with increasing concentrations of Chk1i for 72 hours. Cell viability was determined using SRB (n=3, mean ± SD).

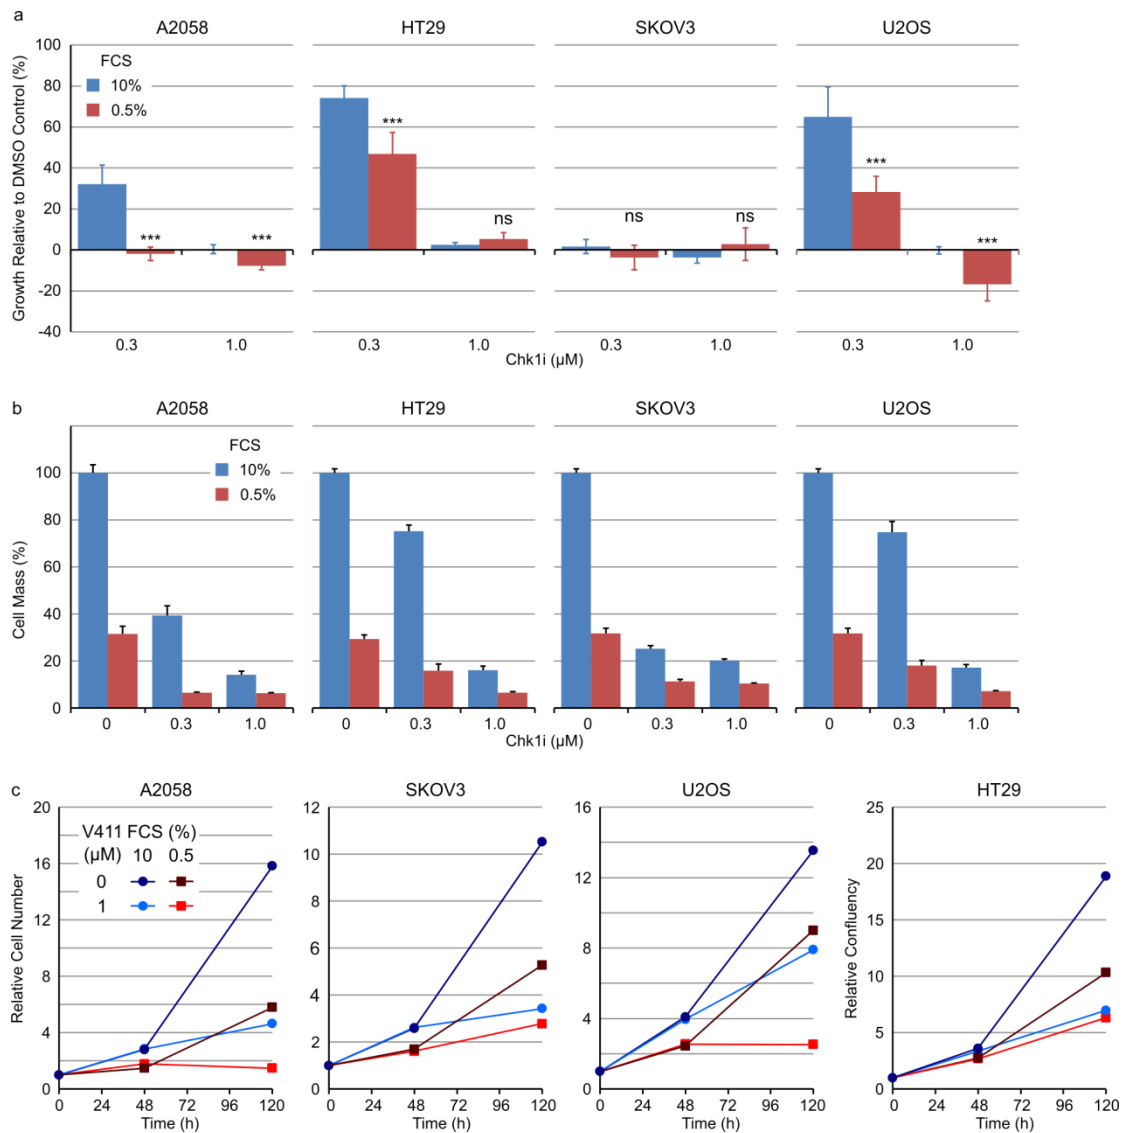

**Supplementary Figure S2.** Related to Fig. 2.

(a) The percentage changes in growth of cells treated with 0.3 or 1.0 μM Chk1i for 96 hours compared to DMSO control were calculated from Figure 2A. Negative growth indicates a reduction in cell number at 96 hours compared to time 0. Statistical significance was determined using a 2-tailed t-test. ns, not significant; \*\*\*,  $P < 0.001$ . (b) Tumour cell lines growing in 10% or 0.5% FCS were treated with 0 – 1 μM Chk1i for 96 hours. Cell mass was determined by SRB staining ( $n=6$ , mean  $\pm$  SD). (c) Tumour cell lines were grown in 10% or 0.5% FCS for 48 hours then treated with 0 or 1 μM Chk1i (in the same FCS percentage) for a further 72 hours. Cell number or confluency was determined using repeated live cell imaging ( $n=6$ , mean).

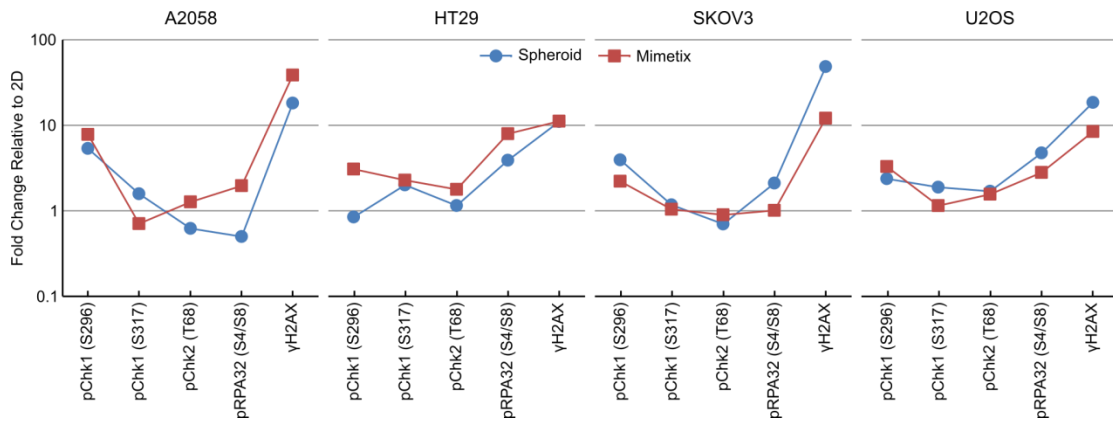

**Supplementary Figure S3.** Related to Fig. 3.

Protein expression data in figure 3A was quantified by densitometry and the ratios of pChk1 (S296) / Chk1, pChk1 (S317) / Chk1, pChk2 (T68) / Chk2, pRPA32 (S4/S8) / RPA32 and  $\gamma$ H2AX / GAPDH calculated. From these, the fold change relative to 2D for cells grown as spheroids or on the mimetix scaffold calculated.

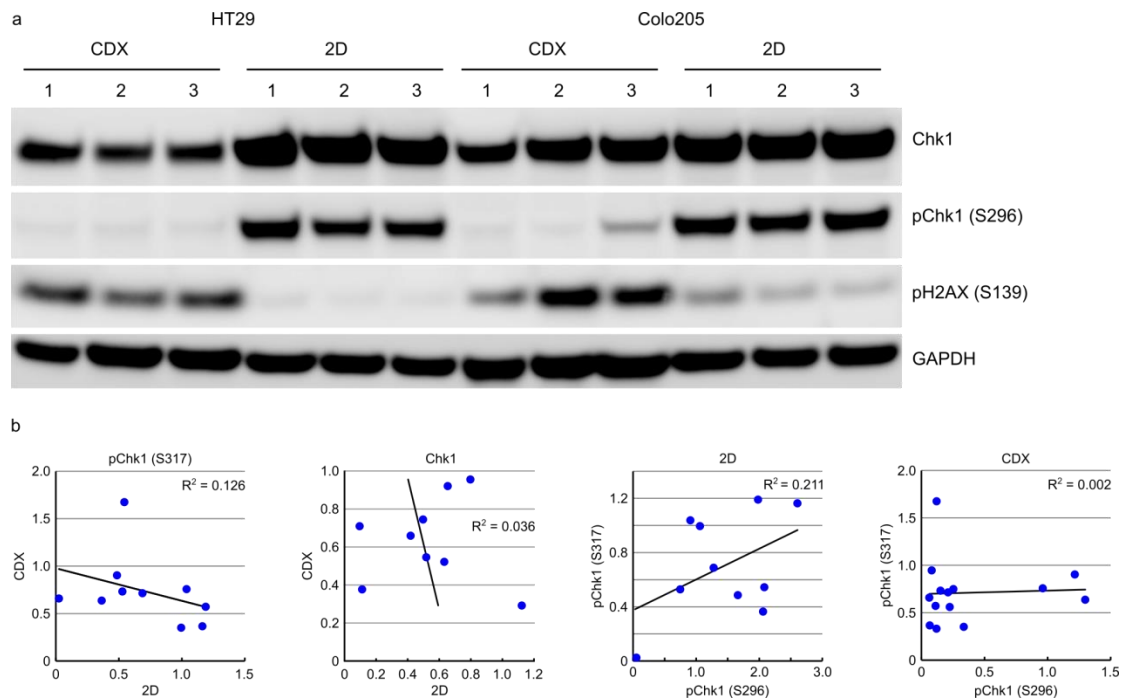

**Supplementary Figure S4.** Related to Fig. 4.

(a) Cell lysates prepared from HT29 or Colo205 cell line derived tumour xenografts (CDX) or anchorage-dependent cell culture (2D) were immunoblotted using the indicated antibodies. (b) Protein expression levels of pChk1 (S296), pChk1 (S317) and total Chk1 were determined by densitometry from Figure 4 western blots of cell lysates derived from cell lines growing as tumour xenografts (CDX) or anchorage-dependently (2D).

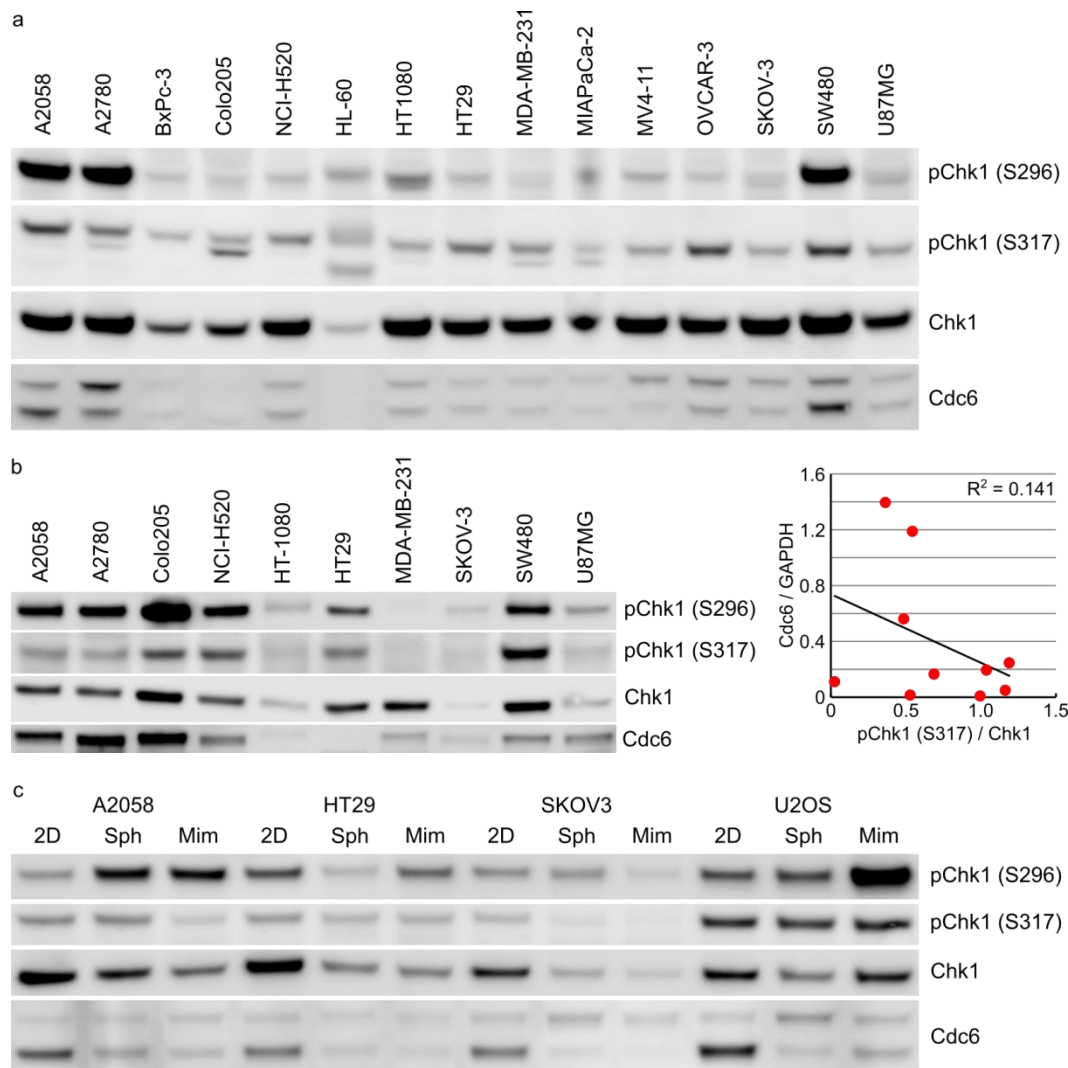

**Supplementary Figure S5.** Related to Fig. 4, 5 and 6.

Composite images of pChk1 (S296), pChk1 (S317), Chk1 and Cdc6 expression data from (a) Fig. 4a and 5a, (b) Fig. 4b and 6a and (c) Fig. 3a and 6b. Protein expression levels in (b) were determined by densitometry.

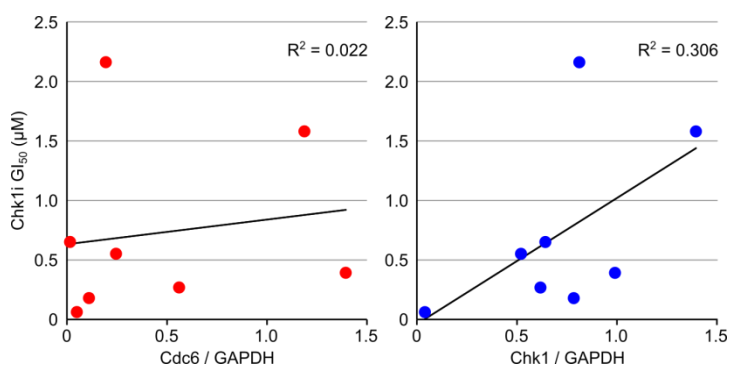

**Supplementary Figure S6.** Related to Fig. 6.

Expression levels of Cdc6 and Chk1 determined in figure 6A were correlated with the 72 hour Chk1i GI<sub>50</sub>.

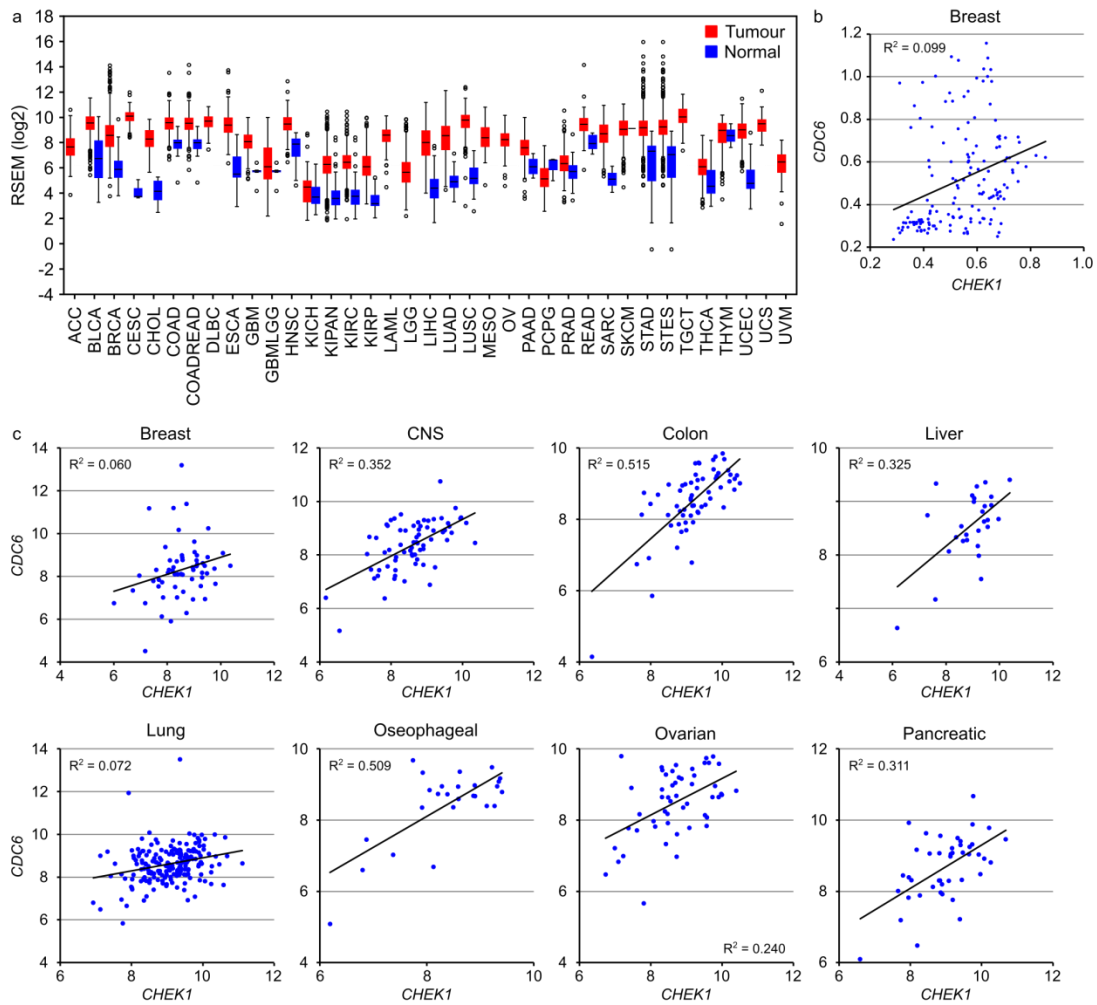

**Supplementary Figure S7.** Related to Fig. 7.

(a) *CDC6* or *CHEK1* mRNA expression in human tumours and normal tissue controls was determined using the Firehose analysis tool from the Broad Institute TCGA Genome Data Analysis Center. (b) The correlation between *CHEK1* (*Chk1*) and *CDC6* mRNA expression levels was determined from publicly available datasets in breast tumours. (c) The correlation between *CHEK1* (*Chk1*) and *CDC6* mRNA expression levels in breast, CNS, colon, liver, lung, oesophageal, ovarian or pancreatic cancer derived cell lines was determined using publicly available data from the Broad Institute Cancer Cell Line Encyclopedia.

**Supplementary Table S1.** Summary of proteins used in experiments.

| Abbrv         | Protein Name                                    | Notes                                                                                                |
|---------------|-------------------------------------------------|------------------------------------------------------------------------------------------------------|
| ATM           | Ataxia-telangiectasia mutated                   | STK, mol. sensor of DNA damage predominantly DSB                                                     |
| ATR           | ATM- and RAD3-related                           | STK, mol. sensor of DNA damage predominantly ssDNA                                                   |
| Cdc6          | Cell division control protein 6 homolog         | Role in initiation of DNA replication and preventing re-replication before mitosis completed         |
| CDK1          | Cyclin dependent kinase 1                       | STK, regulates G2-M transition, P on Y15 by Wee1 (negative regulator of CDK activity)                |
| CDK2          | Cyclin dependent kinase                         | STK, regulates G1-S and S-phase transition, P on Y15 by Wee1 (negative regulator of CDK activity)    |
| CDT1          | DNA replication factor Cdt1                     | Co-operates with Cdc6 to load MCM onto replication origins                                           |
| Chk1          | Checkpoint kinase 1                             | STK, effector kinase of DRR, cis-autoP on S296, P on S317 and S345 by ATR                            |
| Chk2          | Checkpoint kinase 2                             | STK, effector kinase of DDR, P on T68 by ATM                                                         |
| Cyclin A2     | Cyclin-A2                                       | Regulates cell cycle transitions. Complex with CDK2 in S-phase and CDK1 in G2/M                      |
| Cyclin E1     | Cyclin-E1                                       | Regulates cell cycle transitions. Complex with CDK2 in G1 phase, regulates G1-S transition           |
| DNA-PKcs      | DNA-dependent protein kinase catalytic subunit  | STK, mol. sensor of DNA damage, involved in NHEJ of DSB                                              |
| E2F1          | Transcription factor E2F1                       | TF of genes whose products are involved in cell cycle regulation or DNA replication                  |
| GAPDH         | Glyceraldehyde-3-phosphate dehydrogenase        | Loading control                                                                                      |
| Geminin       | Geminin                                         | Inhibits MCM incorporation into pre-RC. Degraded during mitosis, re-expressed in S-phase             |
| HH3           | Histone H3                                      | P on S10 by Aurora B, marker of mitosis                                                              |
| Ki-67         | Antigen KI-67                                   | Expressed in all phases of the cell cycle except G0                                                  |
| MCM2          | DNA replication licensing factor MCM2           | Subunit of mini-chromosome maintenance complex (MCM 2-7)                                             |
| PCNA          | Proliferating cell nuclear antigen              | Auxiliary protein of DNA pol $\delta$ ; involved in the control of eukaryotic DNA replication        |
| Rb            | Retinoblastoma-associated protein               | Key regulator of entry into G1, transcription repressor of E2F1 genes, P on S807 / S811 by CDKs      |
| RPA32         | Replication protein A, 32kDa Subunit            | Subunit of trimeric ssDNA RPA binding protein, P on S4/S8 by DNA-PKcs                                |
| RRM2          | Ribonucleoside-diphosphate reductase subunit M2 | Catalyses biosynthesis of deoxyribonucleotides from ribonucleotides, predominantly S-phase expressed |
| $\gamma$ H2AX | Histone H2AX                                    | Variant of Histone H2A, P on S139 by DNA-PKcs (also ATR and ATM)                                     |

P, phosphorylated; STK, serine / threonine protein kinase; DDR, DNA damage response; mol., molecular; NHEJ, non-homologous end joining; DSB, DNA double strand break; ssDNA, single stranded DNA; CDK, cyclin-dependent kinase; TF, transcription factor

Protein function summarised from UniProt (<http://www.uniprot.org/uniprot/>)
